# Supplementary material
Source: PubMed Central journal article supplement (PMC6211795)
Supplement: NIHMS1506575-supplement-8.pdf [file NIHMS1506575-supplement-8.pdf]

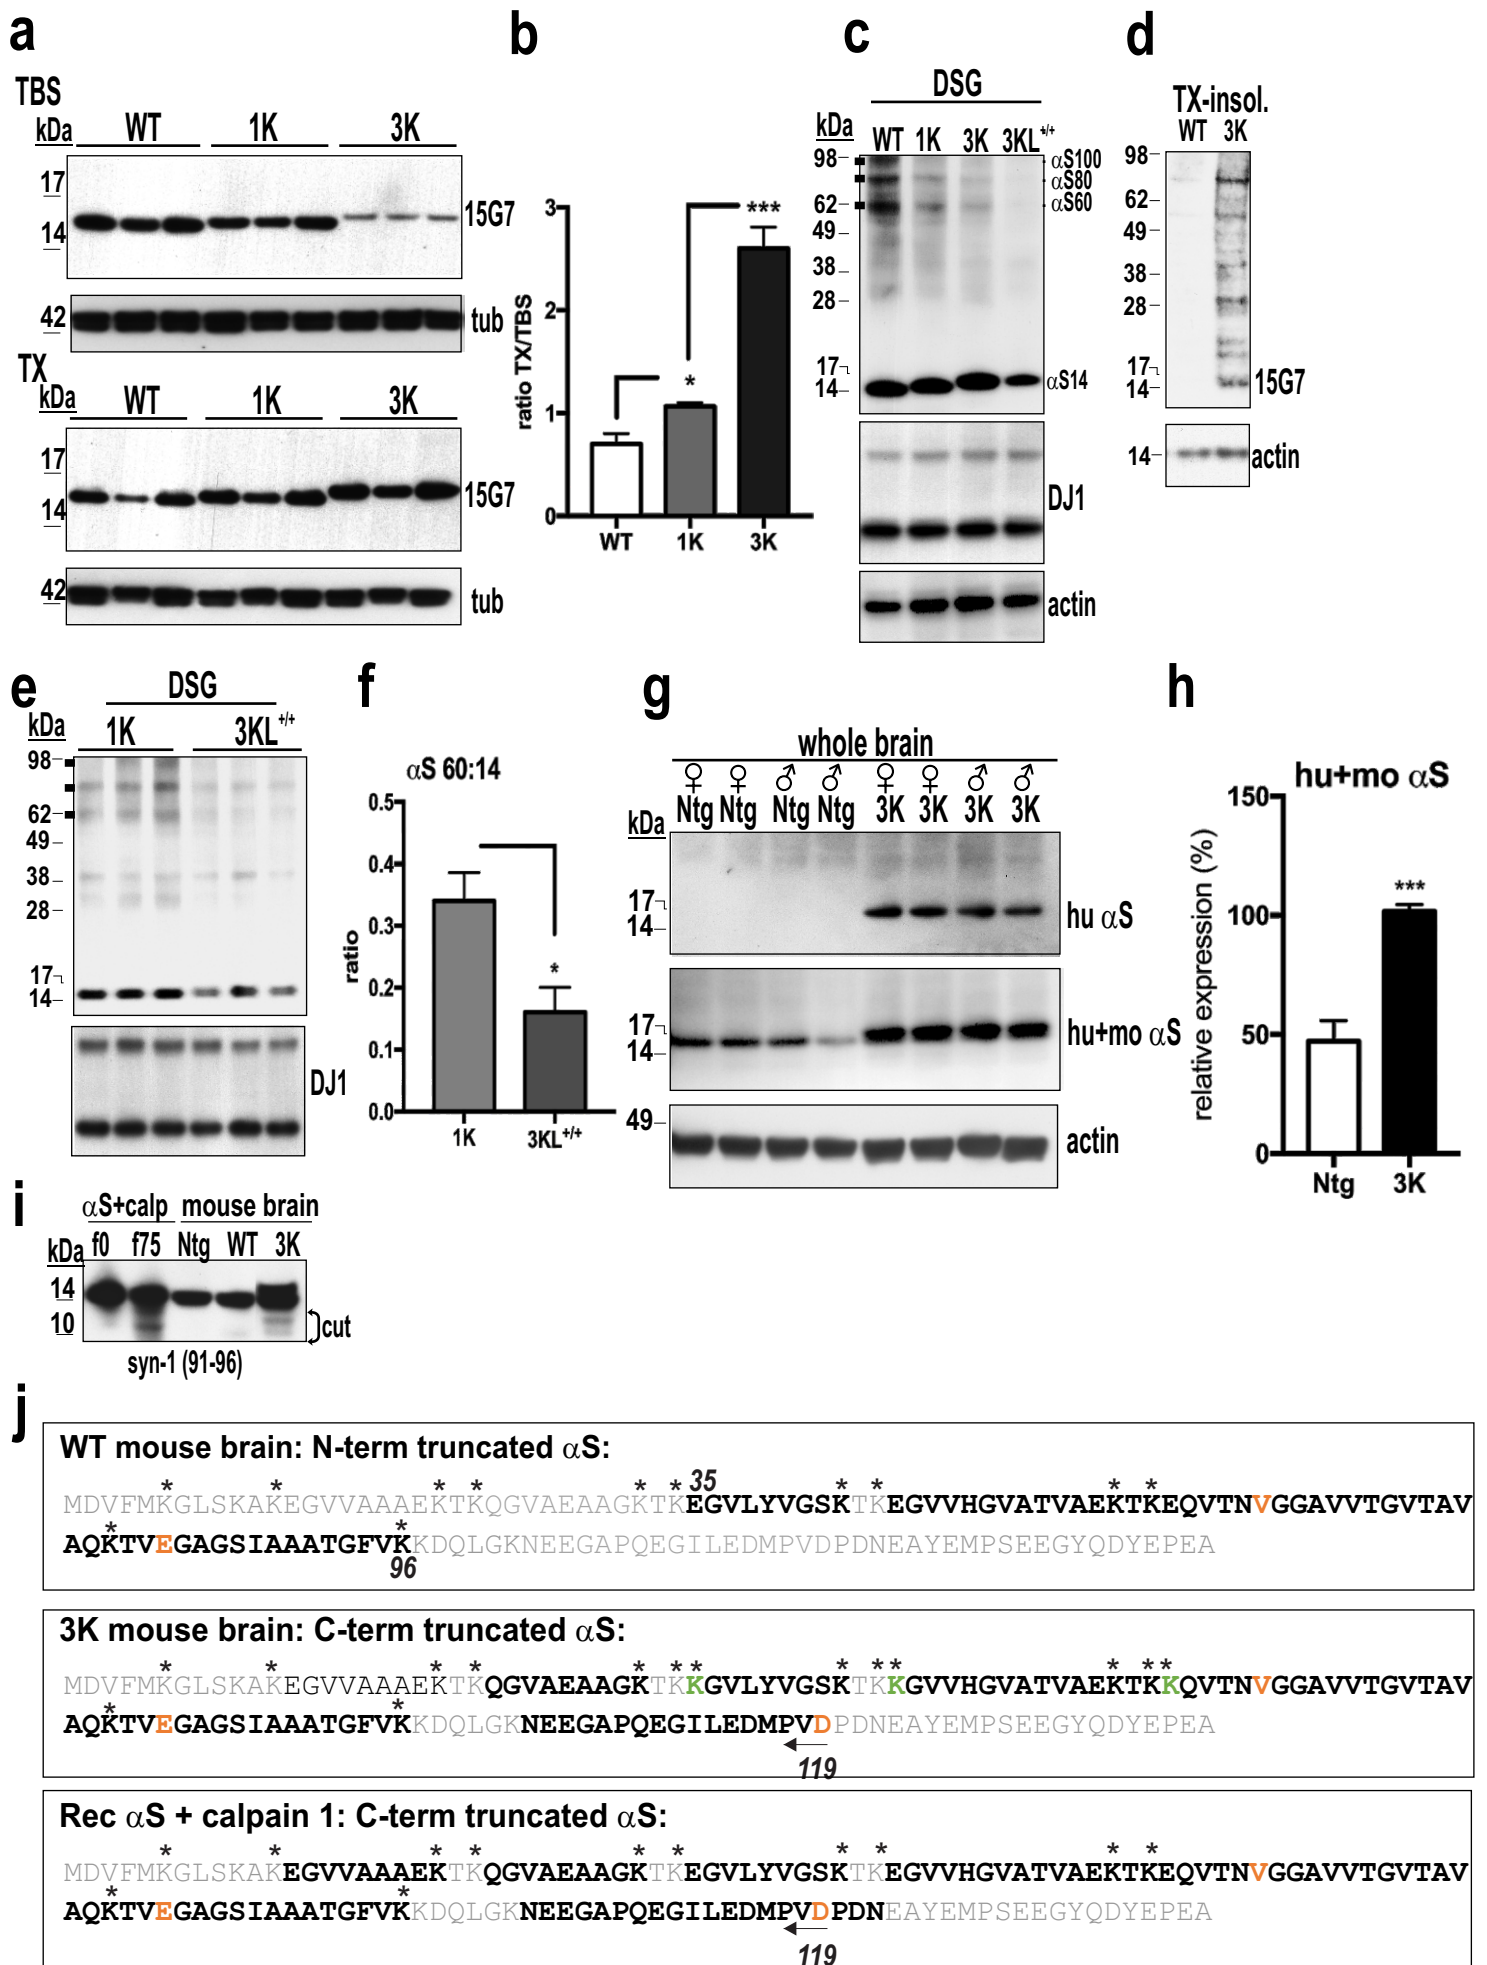

Figure S1

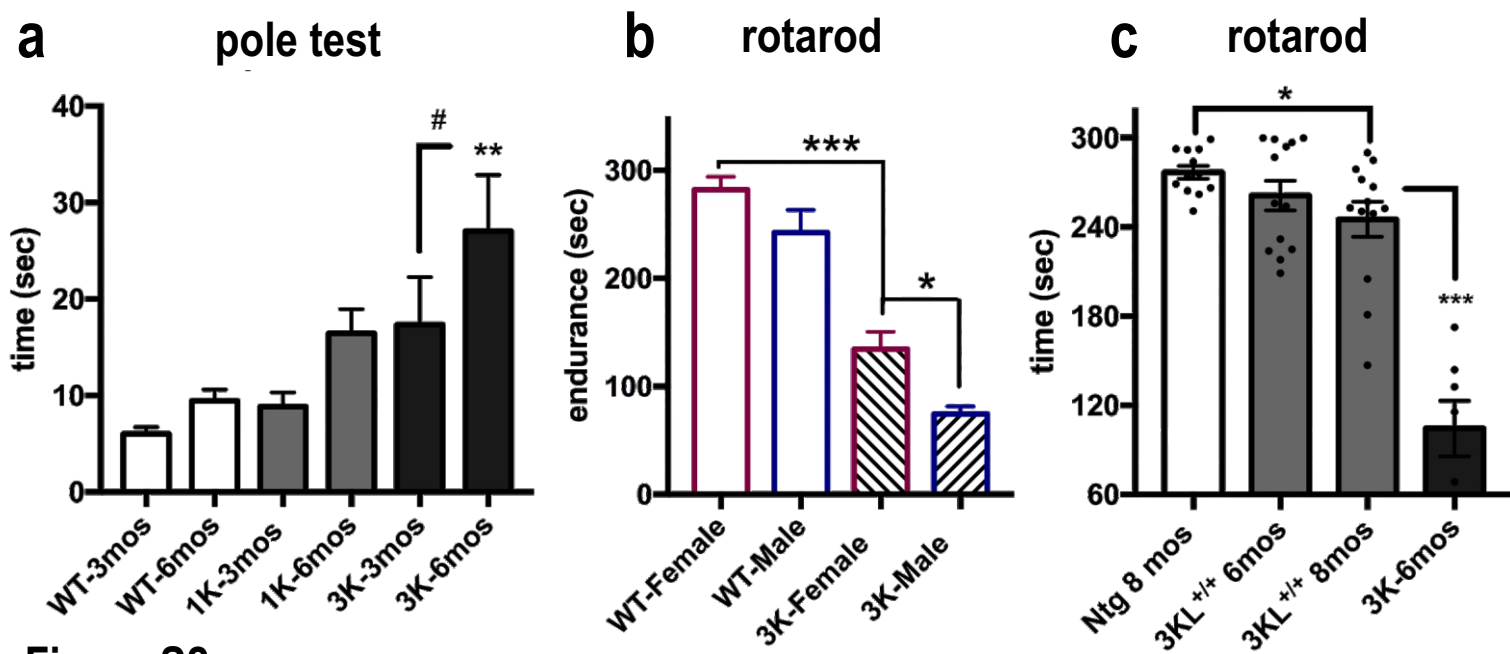

Figure S2

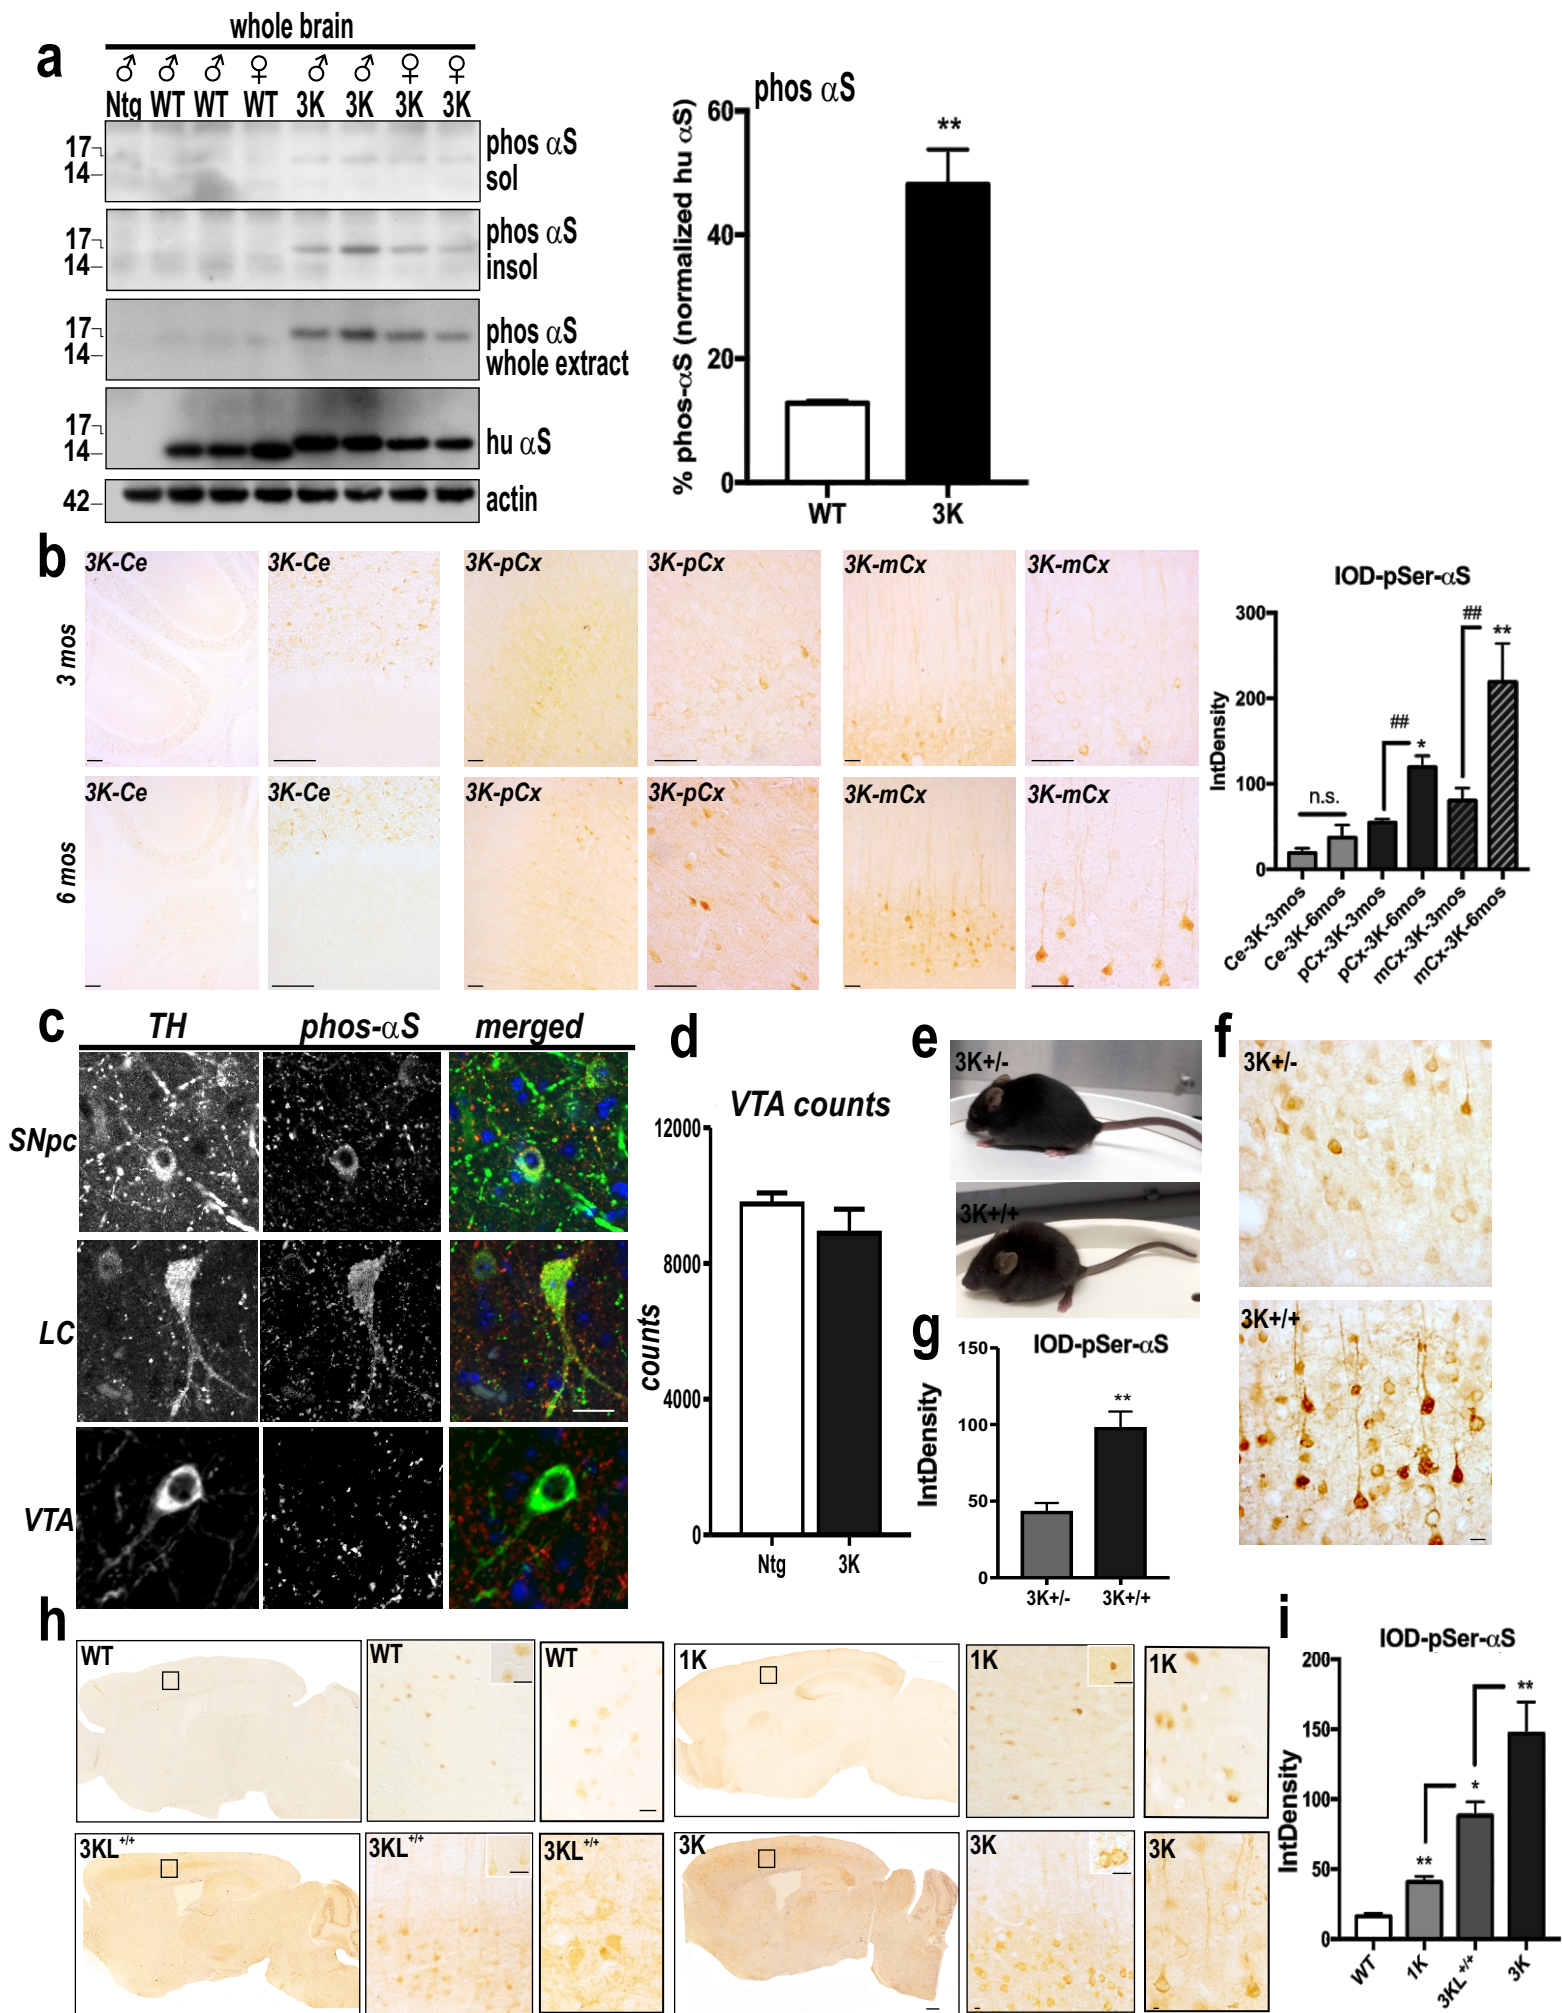

Figure S3



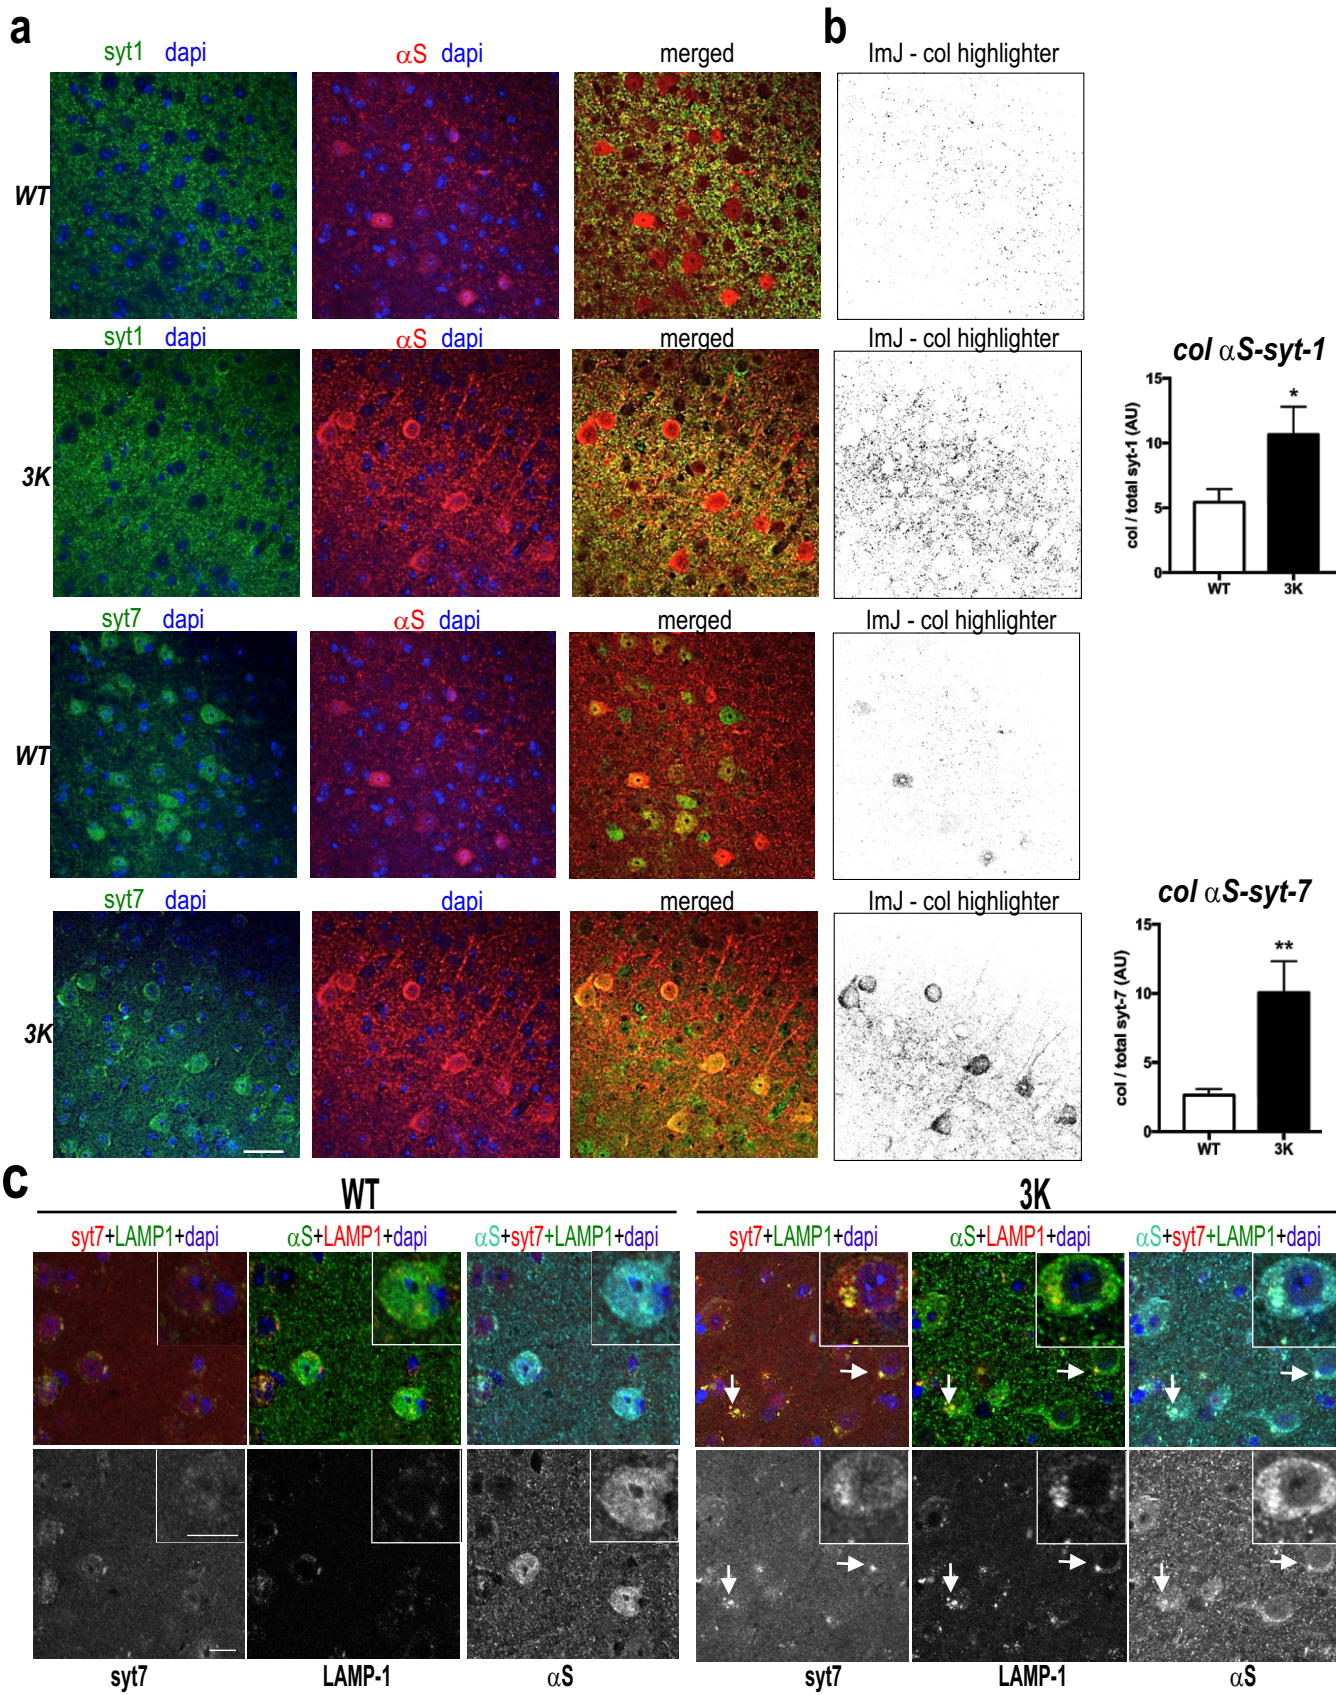



**a**

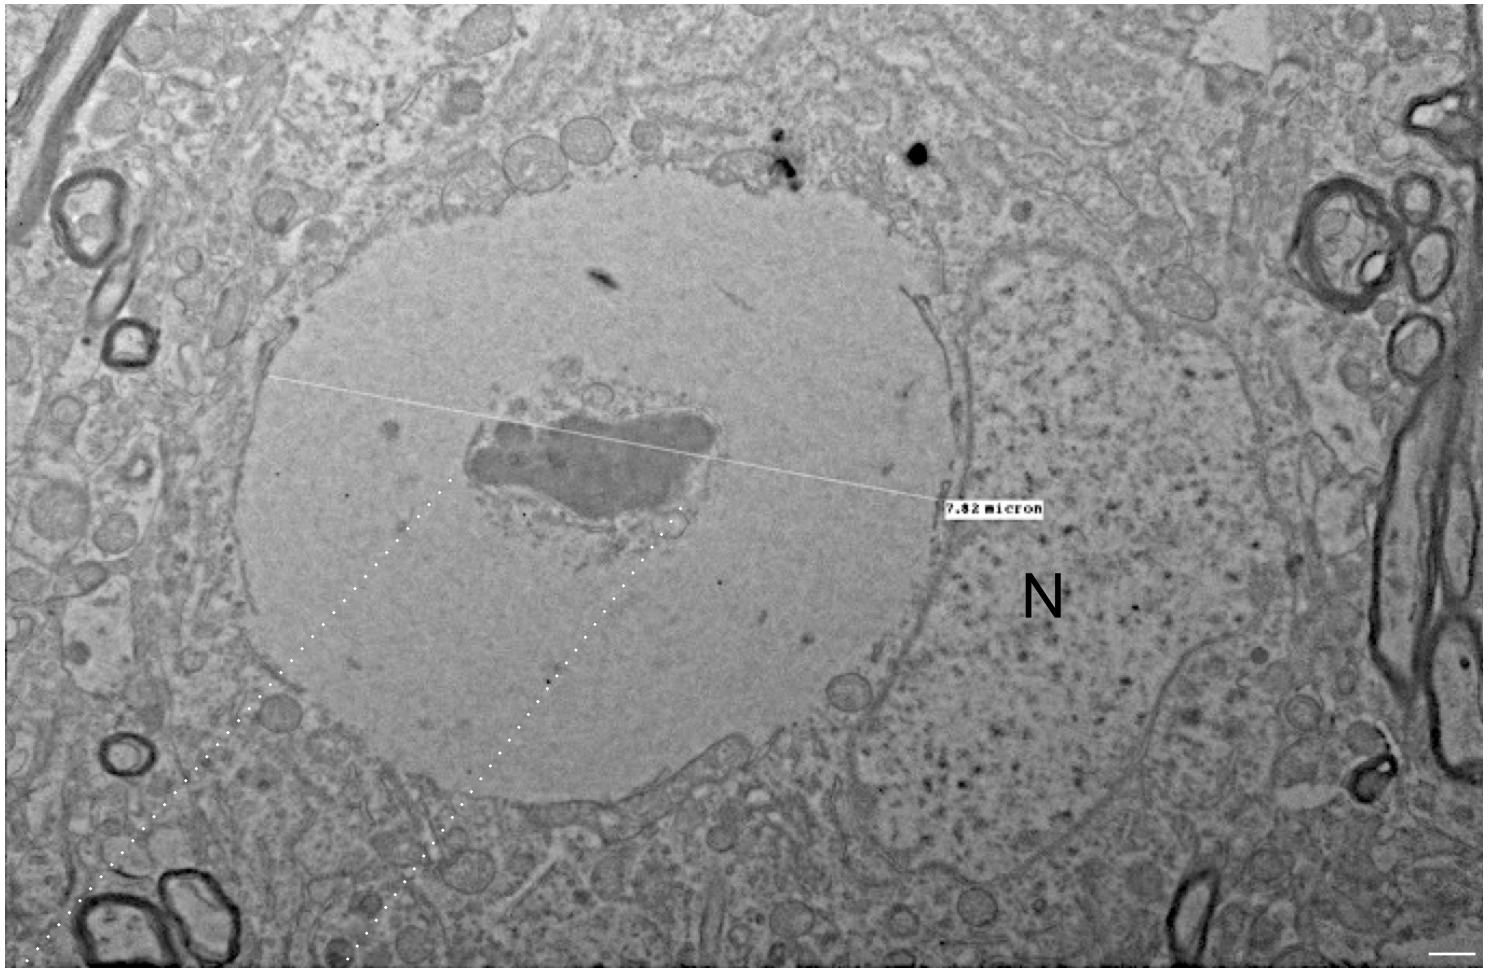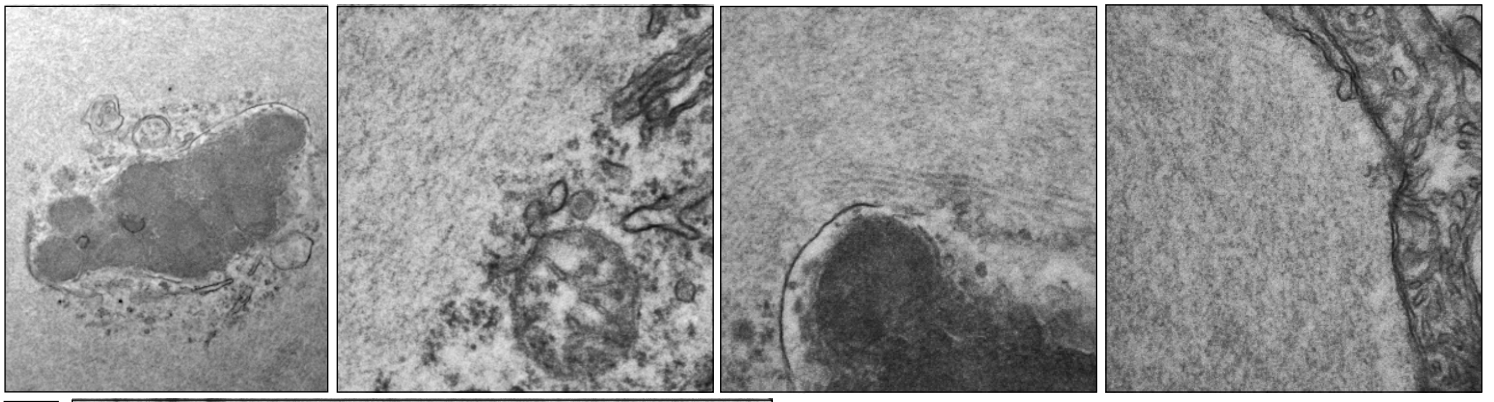

**b**

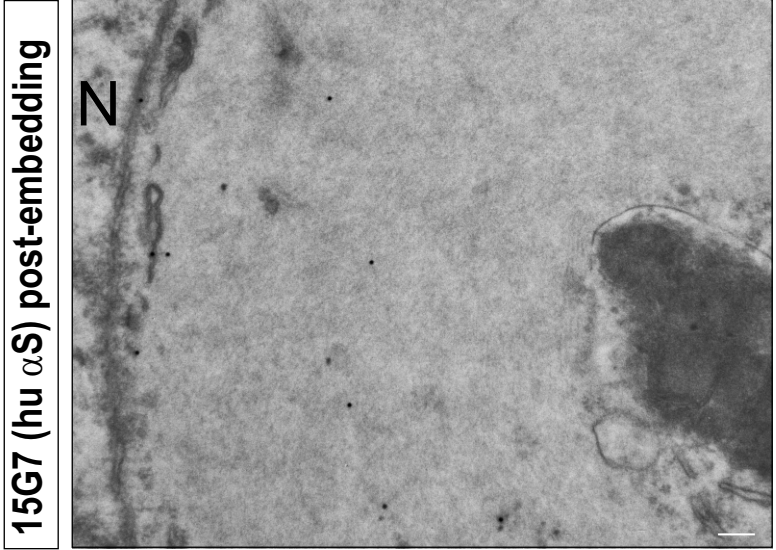

**c**

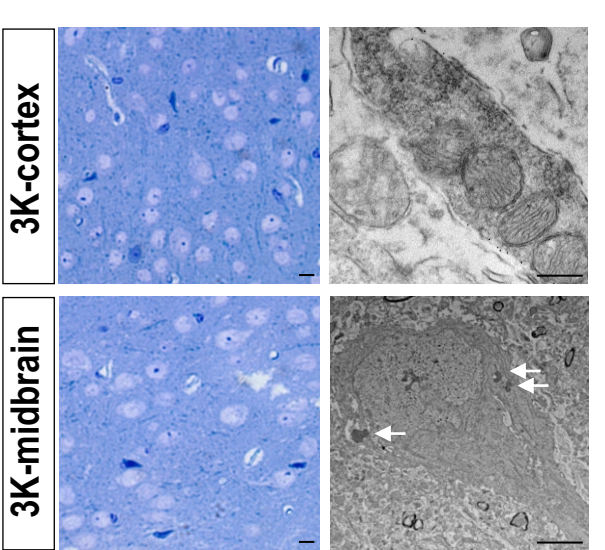

**Figure S5**

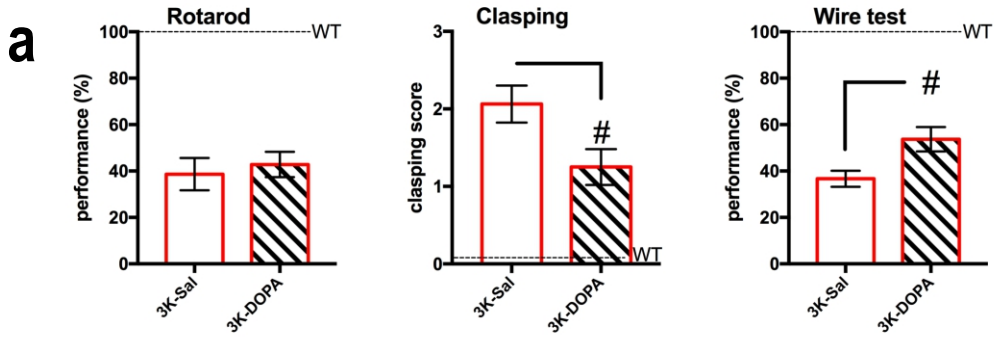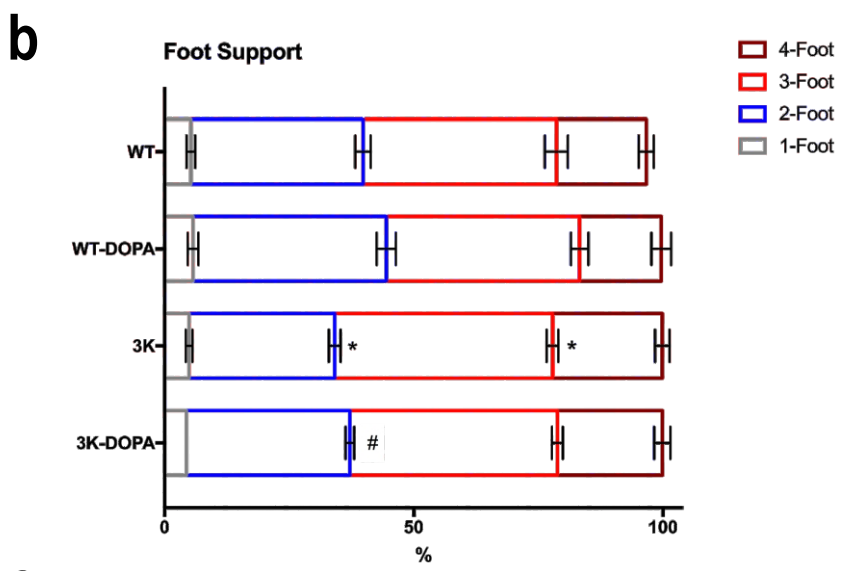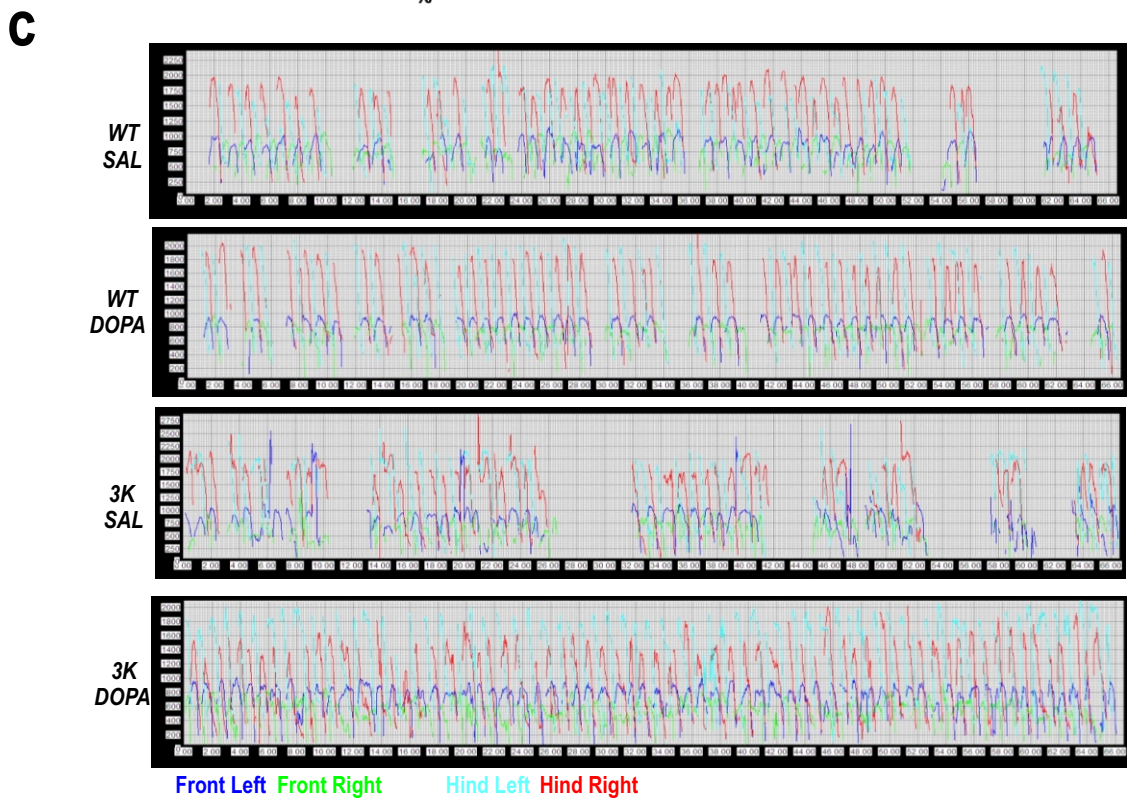

**Figure S6**



## Supplementary Material:

**Figure S1** Biochemical characterization of  $\alpha$ S pattern in E $\rightarrow$ K mutants – related to Figure 2 (a) WB of sequential extractions of TBS-soluble (cytosolic) and TX-soluble (membrane) fractions of cortical homogenates (no crosslinking). (b) Densitometry of the bands (means  $\pm$  SEM) of the same WB shows a stepwise shift from cytosol to membrane fractions in 1K and 3K vs. WT mice. (c) Intact-cell crosslinking of  $\alpha$ S using the cell-penetrant crosslinker DSG on washed cortical brain bits from WT, 1K, 3KL<sup>+/+</sup> and 3K tg mice shows tetramer-deficiency of all 3 mutant lines vs. WT. Mab syn1 detects monomeric ( $\alpha$ S14) and tetrameric ( $\alpha$ S60)  $\alpha$ S and probable conformers of the tetramer ( $\alpha$ S80,  $\alpha$ S100). DJ-1 monomers/dimers serve as control for equal crosslinking and protein loading. (d) TX-insoluble fraction of cortical homogenates. (e) Intact-cell crosslinking of 1K vs. 3KL<sup>+/+</sup> (n=3 each group). (f) Quantification of WB in (e) reveals significant decreases in T:M ratio in 3KL<sup>+/+</sup> vs. 1K. (g) WB of whole brain extracts of n=4 Ntg vs. 3K mice shows ~2-fold overexpression. Hu specific 15G7 (upper panel) or C20 Mab, which detects both human and mouse  $\alpha$ S, and (h) graph. (i) Calpain-dependent  $\alpha$ S truncation in tetramer-deficient 3K mice: mAb Syn-1 WB of rec. fibrillized  $\alpha$ S +/- calpain digestion (lanes 1, 2) and TBS-cytosolic homogenates of mouse cortex of 3 genotypes (lanes 3-5). Bracket: gel slices between 10-12 kDa ( $\Delta$ C) were excised from lanes 4 and 5 (WT and 3K mutant mouse brains);  $\Delta$ C from calpain-cleaved rec  $\alpha$ S (lane 2) served as a positive control to guide excision and for MS. (j) Comparison of protein sequences derived by LC-MS/MS spectra of tryptic peptides (*black asterisks*) from the 10-12 kDa hu  $\alpha$ S fragments of WT and 3K mouse brain and the calpain-cleaved rec.  $\alpha$ S, using Mascot (Matrix Sciences); the detected peptides (in *boldface*) were identified by the Protein Pilot 4.0 software (Absciex). The  $\Delta$ C hu  $\alpha$ S product ending at amino acid D119 (*arrow*) was found in both 3K brain and calpain-cleaved rec.  $\alpha$ S. The longest fragment detected in WT mouse brain spans amino acid 35 to 96. Means  $\pm$  SEM. \*p < 0.05; \*\*\* p < 0.001 in 1K vs. WT or 3K or 3KL<sup>+/+</sup> vs. age- and [ $\alpha$ S]-matched 1K; (b) one-Way ANOVA post Tukey; or (f, h) unpaired 2-tailed Student's *t* test.

**Figure S2** Progressive motor deficits in tetramer-deficient  $\alpha$ S tg mice – related to Figure 3 (a) Graph quantifies time to descend a pole in 3 and 6 mos WT, 1K and 3K mice (n = 6-10 males per group). (b) Accelerating rotarod task (4-40 rpm) reveals more severe motor deficits in 3K males than females, in comparison to their hu WT  $\alpha$ S controls (n=5-8 per group). (c) Graph quantifies endurance time on rotarod in 6 and 8 mos old 3KL<sup>+/+</sup> (homozygous 3K-Low) mice (n = 6-12 mice per group). Means  $\pm$  SEM. \*, # p < 0.05; \*\*, ## p < 0.01; \*\*\* p < 0.001 vs. age-, gender and [ $\alpha$ S]-matched WT; one-way ANOVA, post Tukey.

**Figure S3** Phosphorylated ser129- $\alpha$ S staining of WT and 3K mouse brain tissue – related to Figure 4. (a) WB of sequentially extracted (TBS-) soluble and insoluble as well as whole homogenates blotted for pSer129- $\alpha$ S and hu  $\alpha$ S (15G7); densitometry of whole extracts (right) shows a ~3-fold increase of total pSer129- $\alpha$ S in 3K (line 3817) over WT. (b) Both 3 mos and 6 mos cerebellar sections display minor pSer129 signals compared to a large, age-dependent increase in pyramidal neurons of prefrontal cortex (pCx) and motor cortex (mCx) in 3K mice; quantified on right. (c) pSer129- $\alpha$ S accumulation in TH-positive neurons of the SN pars compacta (SNpc) and locus coeruleus (LC) and few dots in ventral tegmental area (VTA) in 3K brain. Scale bars. (d) Counts of TH+ neurons in the VTA of the midbrain. (e) Motor posture at rest in heterozygous 3K<sup>+/-</sup> and homozygous 3K<sup>+/+</sup> male mice at age 4 wk. Severe hind limb rigidity and decreased motor control in the 3K<sup>+/+</sup> mice result in inability to sustain themselves after weaning (see Movie S7). (f) IHC of pSer129+  $\alpha$ S in sagittal brain sections from 3 mos 3K<sup>+/-</sup> and 1 mos 3K<sup>+/+</sup> mice. (g) Quantification of pSer129 optical density (n=10 fields each of cortical sections from N = 3-4 mice per

genotype). **(h)** Anti-pSer129  $\alpha$ S IHC of WT, 1K, 3KL<sup>+/+</sup> and 3K sagittal brain sections at age 6 mos. Boxes in each section indicate magnified regions shown to right. **(i)** Quant. of pSer129 optical density (n=10 fields each of cortical sections from N = 3 mice per genotype). Means  $\pm$  SEM. \* $p$  < 0.05, \*\* $p$  < 0.01, \*\*\* $p$  < 0.001; (a, d, g) unpaired 2-tailed Student's  $t$  test; (b, i) One-way ANOVA post Tukey. *Scale bars* (b) 50  $\mu$ m (c,d,f, insets in h) 25  $\mu$ m.

**Figure S4** Abnormal  $\alpha$ S accumulation at vesicles in motor cortex of 6 mos 3K mice – related to Figure 6 **(a)** Single and merged stainings show co-localization of  $\alpha$ S with syt-1+ vesicles at synaptic terminals and with syt-7 mainly in neuronal somata. **(b)** ImageJ plug-in co-localization highlighter converts co-localized points into 8-bit greyscale images that were adjusted to a common threshold and quantified. **(c)** Confocal microscopy of sections quadruple-labeled for  $\alpha$ S, syt-7, lysosomal-membrane associated protein-1 (LAMP-1), and nuclei (DAPI). Spectrally unmixed images are in lower panels to show large foci of  $\alpha$ S, syt-7 and LAMP-1, and their overlap is shown in triple-merged upper panels. Means  $\pm$  SEM. \* $p$  < 0.05, \*\* $p$  < 0.01, unpaired 2-tailed Student's  $t$  test. *Scale bars* (a) 50  $\mu$ m, (c) 25  $\mu$ m.

**Figure S5** Ultrastructure of a cortical neuronal soma from a 16 mos old 3K male mouse – related to Figure 7. Top: **(a)** EM reveals the spherical, LB-like inclusion consists of filamentous material that is associated with a central lipofuscin deposit and membranous organelles (mainly mitochondria) along the periphery. N, nucleus. Below: Higher power EMs show a lipofuscin-rich core (far left) and **(b)** 15G7 hu  $\alpha$ S immunogold labeling of dense filamentous deposits throughout the rest of the round inclusion. **(c)** Degenerated neurons and synapses in 3K brain. *Left*: Toluidine-blue stained semi-thin sections of cortex (upper panel) and midbrain (lower panel) show scattered neurons with dark and dense appearance of the cytoplasm and nuclear areas, shrunken cytoplasm and triangular shapes. *Right*: Dark degenerated synapses and a dark-degenerated neuron, displaying lipid deposits (white arrow) were seen. *Scale bars*: (a) top, left and bottom panel = 500nm, all other panels = 100 nm, (c-left) 20  $\mu$ m, (c-right) 1  $\mu$ m.

**Figure S6** Gait analyses of 3K and WT mice before vs. after L-DOPA treatment – related to Figure 7. **(a)** Graphs showing L-DOPA ameliorates limb clasping and improves (lengthens) wire hanging performance, while no treatment effect occurs on the accelerating rotarod test. **(b)** Limb support graph shows L-DOPA ameliorates the elevated 3-foot and reduced 2-foot support of 3K mice. **(c)** Stance graph of the same 3K and WT mouse after saline (SAL) or L-DOPA i.p. treatment. Harmonization of the marked stance anomalies of front and hind limbs of the 3K mice upon L-DOPA treatment. Means  $\pm$  SEM. \* $p$  < 0.05 WT-Sal vs. 3K-Sal; # $p$  < 0.05 3K-Sal vs. 3K-DOPA, unpaired 2-tailed Student's  $t$  test.

**Table S1:** Key characteristics of  $\alpha$ S tetramers and their potential relevance to PD, related to Figures 1-7

**Table S2:** Mouse models of PD which express hu  $\alpha$ S and explore L-DOPA responsive phenotypes, related to Figures 2-7



**Table S2.** Mouse models of PD which express hu  $\alpha$ S and explore L-DOPA responsive phenotypes – related to Figs. 2-7

| PD mutation                   | promoter/zygosity | motor onset | $\alpha$ S inclusions |                        | DAergic integrity |                  |        | motor deficit                                       | L-DOPA              | reference                    |
|-------------------------------|-------------------|-------------|-----------------------|------------------------|-------------------|------------------|--------|-----------------------------------------------------|---------------------|------------------------------|
|                               |                   |             | cortex                | mid-brain              | SN cell loss      | striatal loss    | VTA    |                                                     |                     |                              |
| <b>single-mutation models</b> |                   |             |                       |                        |                   |                  |        |                                                     |                     |                              |
| WT                            | Thy-1/het         | 3 mos       | 4-5 mos               | 4-5 mos                | none              | 6 mos            | NR     | beam slips                                          | 25 mg/kg worse      | 1-3                          |
|                               | CaMKIIa/het       | 8 mos       | NR                    | 20 mos                 | 20 mos*           | NR               | NR     | rotarod deficit                                     | NR                  | 4                            |
|                               | PDGF $\beta$ /het | 9 mos       | 2-3 mos               | 2-3 mos                | none              | 12 mos           | NR     | rotarod deficit                                     | NR                  | 5                            |
| A53T                          | Prnp/hom          | 15-16 mos   | sparse                | none                   | none              | none             | NR     | 4-limb paresis                                      | NR                  | 6                            |
|                               | Thy-1/hom         | 6 mos       | NR                    | NR                     | NR                | NR               | NR     | gait, rotarod deficit                               | NR                  | 7,8                          |
|                               | DAT-PF/het        | none        | none                  | 1 mos                  | 3 mos             | 3-12 mos         | spared | none                                                | NR                  | 9                            |
| A30P                          | Thy-1/hom         | 8 mos       | sparse                | none                   | none              | none             | NR     | rotarod deficit                                     | NR                  | 10                           |
| E46K                          | Prnp/hom          | 16-29 mos   | 15-19 mos             | 22 mos                 | none              | none             | NR     | 4-limb paresis                                      | NR                  | 11                           |
|                               | BAC/het           | 6 mos*      | 6 mos size $\uparrow$ | 6 mos size $\uparrow$  | 12mos*            | NR               | NR     | pole deficit                                        | NR                  | present study, <sup>12</sup> |
| LRRK-2                        | TH-G2019S/het     | 24 mos      | NR                    | 15 mos size $\uparrow$ | 15 mos            | 24 mos {DA}      | NR     | gait, pole deficit,                                 | 20 mg/kg improved   | 13                           |
|                               | R1441G-BAC/het    | 10-12 mos   | none                  | none                   | none              | 10-12 mos{DA}    | spared | immobility                                          | 20 mg/kg improved   | 14                           |
| <b>multi-mutation models</b>  |                   |             |                       |                        |                   |                  |        |                                                     |                     |                              |
| LRRK2-A53T                    | CaMKIIa/het       | none        | none                  | none                   | NR                | 1 mos (neuronal) | NR     | hyperactivity#                                      | none                | 15                           |
| A30P-A53T                     | TH/het            | 13-23 mos   | none                  | none                   | 8.5 mos           | 16-18 mos{DA}    | NR     | hypolocomotion                                      | none                | 16,17                        |
| 3K E35,46,61K                 | Thy-1.2/het       | 3 mos       | 3 mos size $\uparrow$ | 3 mos size $\uparrow$  | 6 mos             | 6 mos            | spared | resting tremor, gait, pole deficit, rotarod deficit | 12.5 mg/kg improved | present study                |

Abbreviation: NR, not reported. het, heterozygous. hom, homozygous. \*tendency; #only A53T-dependent hyperactivity

**For reference details see also main reference list :** (1) Rockenstein et al., *J Neurosci Res*, 2002. (2) Fleming et al., *J Neurosci*, 2004. (3) Fleming et al., *Neuroscience*, 2006. (4) Nuber et al., *J Neurosci*, 2008. (5) Masliah et al., *Science*, 2000. (6) Giasson et al., *Neuron*, 2002. (7) Chandra et al., *Cell*, 2005. (8) Rothman et al., *J Parkinsons Dis*, 2013. (9) Chen et al., *J Neurosci*, 2015. (10) Neumann et al., *J Clin Invest*, 2002. (11) Emmer et al., *J Biol Chem*, 2011. (12) [https://www.michaeljfox.org/files/MJFF\\_SfN\\_aSyn\\_Poster.pdf](https://www.michaeljfox.org/files/MJFF_SfN_aSyn_Poster.pdf) (13) Xiong et al., *PNAS*, 2018. (14) Li et al., *Nat Neurosci*, 2009. (15) Lin et al., *Neuron*, 2009. (16) Richfield et al., *Exp Neurol*, 2002. (17) Thiruchelvam et al., *Eur J Neurosci* (2004).

**Table S1. Key characteristics of  $\alpha$ S tetramers and their potential relevance to PD – related to Figs.1,2**

|                        |                                                                                                                                                                                                                                                                                                                                                                                                                                                                                                                                                                                                                                                                                                                                                                                                                                                                                                                                                                                                                                                                               |
|------------------------|-------------------------------------------------------------------------------------------------------------------------------------------------------------------------------------------------------------------------------------------------------------------------------------------------------------------------------------------------------------------------------------------------------------------------------------------------------------------------------------------------------------------------------------------------------------------------------------------------------------------------------------------------------------------------------------------------------------------------------------------------------------------------------------------------------------------------------------------------------------------------------------------------------------------------------------------------------------------------------------------------------------------------------------------------------------------------------|
| <b>metastable</b>      | <p><b>detected under specific conditions</b></p> <ul style="list-style-type: none"> <li>• non-denaturing conditions<sup>(a),(e),(f),(j)</sup></li> <li>• with cell-permeable crosslinkers<sup>(a),(e),(f)</sup></li> <li>• under „molecular crowding“ conditions in cell lysates<sup>(e),(j)</sup></li> <li>• mostly found in the cytosol (TBS-soluble) fraction<sup>(e),(f)</sup></li> </ul>                                                                                                                                                                                                                                                                                                                                                                                                                                                                                                                                                                                                                                                                                 |
| <b>not an artifact</b> | <p><b>trapping of the native conformational state</b></p> <ul style="list-style-type: none"> <li>• a non-stochastic pattern by intact-cell crosslinking (14, 60, 80, 100 kDa)<sup>(a),(e),(f),(l),(m)</sup></li> <li>• also seen by live-cell fluorescence protein (YFP) complementation<sup>(f),(i)</sup></li> </ul>                                                                                                                                                                                                                                                                                                                                                                                                                                                                                                                                                                                                                                                                                                                                                         |
|                        | <p><b>potential physiological function</b></p> <ul style="list-style-type: none"> <li>• transient vesicle association of multimers regulating neurotransmission<sup>(h)</sup></li> <li>• cytosolic storage form resisting pathologic aggregation<sup>(a),(d)</sup></li> </ul>                                                                                                                                                                                                                                                                                                                                                                                                                                                                                                                                                                                                                                                                                                                                                                                                 |
| <b>non-pathologic</b>  | <p><b>abundant in native (intact-cell) healthy tissue</b></p> <ul style="list-style-type: none"> <li>• freshly biopsied normal human brain<sup>(e)</sup></li> <li>• freshly biopsied normal mouse brain (Ntg, WT)<sup>(e),(m)</sup></li> <li>• iPSC-derived wt human neurons<sup>(e),(l)</sup></li> <li>• can be isolated from normal human red blood cells and bacteria<sup>(a-d)</sup></li> </ul>                                                                                                                                                                                                                                                                                                                                                                                                                                                                                                                                                                                                                                                                           |
|                        | <p><b>shared conformation with homologues not implicated in PD</b></p> <ul style="list-style-type: none"> <li>• <math>\beta</math>-synuclein, <math>\gamma</math>-synuclein<sup>(e)</sup></li> </ul>                                                                                                                                                                                                                                                                                                                                                                                                                                                                                                                                                                                                                                                                                                                                                                                                                                                                          |
| <b>PD relevance</b>    | <p><b>Tetramer abrogation causes inclusion formation and neurotoxicity<sup>(f),(g),(k),(m)</sup></b></p> <p><b>Tetramer abrogation causes pathologic modifications like those in PD</b></p> <ul style="list-style-type: none"> <li>• pSer129+, <math>\Delta</math>C-truncation, PK-resistance, relative insolubility<sup>(m)</sup></li> </ul> <p><b>Pathologic redistribution consistent with early Lewy-type changes</b></p> <ul style="list-style-type: none"> <li>• abnormal membrane association, vesicle clustering<sup>(g),(i),(k),(m)</sup></li> <li>• lysosomal alteration<sup>(l),(m)</sup></li> </ul> <p><b>PD-causing gene defects decrease the tetramer:monomer ratio in cells</b></p> <ul style="list-style-type: none"> <li>• familial <math>\alpha</math>S mutations (A30P, E46K, H50Q, G51D, A53T)<sup>(f)</sup></li> <li>• Gaucher's GBA mutations lower the T:M ratio (of wt <math>\alpha</math>S)<sup>(l)</sup></li> <li>• In mice, 3x(E46K) yields PD-like <math>\alpha</math>S neuropathology and L-DOPA-responsive motor signs<sup>(m)</sup></li> </ul> |

**For reference details, see also main reference list: (a)** Bartels et al., *Nature*, 2011. **(b)** Wang et al., *PNAS*, 2011. **(c)** Trexler et al., *Prot Sci*, 2012. **(d)** Westphal et al., *JBC*, 2012. **(e)** Dettmer et al., *JBC*, 2013. **(f)** Dettmer et al., *Nat Commun*, 2015. **(g)** Dettmer et al., *PNAS*, 2015. **(h)** Burre et al., *PNAS*, 2014. **(i)** Wang et al., *Curr Biology*, 2014. **(j)** Luth et al., *Biochemistry*, 2015. **(k)** Dettmer et al., *Hum Mol Gen*, 2017. **(l)** Kim et al., *PNAS*, 2018.

**(m) present study**
